# Supplementary material
Source: publisher site journal article supplement (https://www.dovepress.com/article/557028)
Supplement: Supplementary file 1 [file supplementary%20materials.docx]

supplementary materials

Table S1 Antibiotic susceptibility profiles of carbapenem-resistant *Klebsiella pneumoniae* strains used for outer membrane vesicle (OMV) isolation.

|  | MIC(μg/ml) of strains | |
| --- | --- | --- |
| Antibiotic | KP-R1 | KP-R2 |
| Ampicillin  Amoxicillin - Clavulanic acid  Tazobactam - Piperacillin  Ceftriaxone  Cefepime  Aztreonam  Meropenem  Ertapenem  Imipenem  Amikacin  Tobramycin  Ciprofloxacin  Levofloxacin  Tigecycline  Sulfamethoxazole - Trimethoprim  Cefoperazone Sodium Sulbactam  Ceftazidime - Avibactam  Colistin | ≥32  ≥32  ≥128  ≥64  ≥32  ≥64  ≥16  ≥8  ≥16  8  ≥16  ≥4  ≥8  2  ≥320  ≥32  ≥16  2 | ≥32  ≥32  ≥128  ≥64  ≥32  ≥64  ≥16  ≥32  ≥16  ≥64  ≥16  ≥4  ≥8  2  ≥320  ≥32  2  ≥16 |
